# Supplementary material
Source: PubMed Central journal article supplement (PMC8174771)
Supplement: aem.00546-21-s0001.pdf [file aem.00546-21-s0001.pdf]

## SUPPLEMENTAL DATA

### Metagenomic characterization of soil microbial communities in the Luquillo experimental forest (Puerto Rico) and implications for nitrogen cycling

Smruthi Karthikeyan<sup>1</sup>, Luis H. Orellana<sup>1</sup>, Eric R. Johnston<sup>1</sup>, Janet K. Hatt<sup>1</sup>, Frank Loeffler<sup>3,4</sup>, Hector Ayala-del-Rio<sup>4</sup>, Grizelle Gonzalez<sup>5</sup>, Konstantinos T Konstantinidis<sup>1,2</sup>

**Table S1: Physicochemical parameters of soils at the sampling sites**

| Description           | Total C | Total N | Moisture | Class           | pH   | Chloride | NO <sub>3</sub> -N | PO <sub>4</sub> | Sulfate | NO <sub>2</sub> -N | Chlorine | NH <sub>4</sub> -N |
|-----------------------|---------|---------|----------|-----------------|------|----------|--------------------|-----------------|---------|--------------------|----------|--------------------|
| El Verde(0-5)         | 6.962   | 0.446   | 37.7%    | Clay            | 4.42 | 35.49    | < 0.190            | < 1.0           | 6.64    | < 0.210            | 1.50     | 15.37              |
| El Verde(5-20)        | 3.698   | 0.246   | 33.8%    | Clay            | 4.45 | 21.06    | < 0.190            | < 1.0           | 2.31    | < 0.210            | 0.35     | 3.78               |
| El Verde(20-30)       | 2.964   | 0.194   | 32.9%    | Clay            | 4.50 | 14.48    | < 0.190            | < 1.0           | < 0.850 | < 0.210            | 0.30     | 2.39               |
| Sabana 4(0-5)         | 3.960   | 0.281   | 33.1%    | Clay            | 4.91 | 14.78    | < 0.190            | < 1.0           | 8.70    | < 0.210            | 1.05     | 10.75              |
| Sabana 4(5-20)        | 1.719   | 0.167   | 30.7%    | Clay            | 4.72 | 11.68    | < 0.190            | < 1.0           | 3.43    | < 0.210            | 0.40     | 2.39               |
| Sabana 4(20-30)       | 0.980   | 0.081   | 29.2%    | Clay            | 4.71 | 8.34     | < 0.190            | < 1.0           | 2.43    | < 0.210            | 0.10     | 0.90               |
| Palm Nido(0-5)        | 7.171   | 0.320   | 49.7%    | Clay            | 4.86 | 71.2     | 0.388              | < 1.0           | 11.34   | < 0.210            | 0.33     | 7.12               |
| Palm Nido(5-20)       | 6.604   | 0.280   | 48.9%    | Clay Loam       | 4.97 | 82.2     | < 0.190            | < 1.0           | 10.08   | < 0.210            | 0.15     | 5.52               |
| Palm Nido(20-30)      | 5.633   | 0.255   | 44.7%    | Clay Loam       | 4.93 | 10.54    | < 0.190            | < 1.0           | < 0.850 | < 0.210            | 0.15     | 3.26               |
| Pico del Este (0-5)   | 12.091  | 0.428   | 58.7%    | Loam            | 4.65 | 31.83    | < 0.190            | < 1.0           | 14.90   | < 0.210            | 0.75     | 3.18               |
| Pico del Este (5-20)  | 8.489   | 0.338   | 54.2%    | Silty Clay Loam | 4.67 | 59.84    | < 0.190            | < 1.0           | 6.46    | < 0.210            | 0.55     | 1.16               |
| Pico del Este (20-30) | 3.001   | 0.131   | 43.8%    | Clay            | 4.69 | 8.76     | < 0.190            | < 1.0           | 3.34    | < 0.210            | 0.85     | 0.73               |

Total carbon and nitrogen are reported as % of dry weight; the remaining parameters measured are in mg/kg of soil at time of sampling (not dried).

**Table S2: Summary of metagenome sample statistics**

| Metagenome ID   | Location      | Sampling depth | # Raw Reads | # Trimmed Reads | Avg. trimmed read length (bp) |
|-----------------|---------------|----------------|-------------|-----------------|-------------------------------|
| A_13_1-34437631 | El Verde      | 0-5cm          | 38,603,184  | 32,943,766      | 144.756                       |
| B_13_2-34462536 | El Verde      | 5-20cm         | 38,969,952  | 33,517,824      | 143.034                       |
| C_13_3-34460523 | El Verde      | 20-30cm        | 20,216,828  | 17,089,932      | 145.622                       |
| D_15_1-34460524 | Sabana        | 0-5cm          | 34,703,794  | 28,887,538      | 145.49                        |
| E_15_2-3445656  | Sabana        | 5-20cm         | 22,378,594  | 18,599,372      | 146.281                       |
| F_15_3-34451556 | Sabana        | 20-30cm        | 39,659,410  | 34,311,032      | 142.323                       |
| G_16_1-34436613 | Palm Nido     | 0-5cm          | 34,673,362  | 29,740,678      | 144.644                       |
| H_16_2-34437633 | Palm Nido     | 5-20cm         | 51,852,508  | 45,179,536      | 143.475                       |
| I_16_3-34437634 | Palm Nido     | 20-30cm        | 37,730,948  | 32,375,758      | 145.815                       |
| J_22_1-34456569 | Pico del Este | 0-5cm          | 29,380,762  | 24,855,902      | 146.252                       |
| K_22_2-34442602 | Pico del Este | 5-20cm         | 37,087,112  | 32,062,404      | 145.171                       |
| L_22_3-34452542 | Pico del Este | 20-30cm        | 37,532,494  | 32,453,186      | 144.221                       |

**Table S3: Key soil chemical parameters shaping the observed community diversity.**

|                | NMDS1    | NMDS2    | r2     | Pr(>r) |                                  |
|----------------|----------|----------|--------|--------|----------------------------------|
| Site           | 0.97015  | 0.24249  | 0.937  | 0.001  | <b>Statistically significant</b> |
| Total_carbon   | 0.93321  | 0.35933  | 0.4486 | 0.078  |                                  |
| Total Nitrogen | 0.83465  | 0.55078  | 0.0997 | 0.625  |                                  |
| pH             | 0.2074   | 0.97826  | 0.7203 | 0.003  | <b>Statistically significant</b> |
| Sampling depth | -0.08845 | -0.99608 | 0.1204 | 0.568  |                                  |
| Soil Moisture  | 0.97477  | 0.2232   | 0.8152 | 0.002  | <b>Statistically significant</b> |

**Table S4: Distance-based redundancy analysis (dbRDA) of the impact of site/location and sampling depth on the microbial community diversity patterns observed among the sites.**

|                     | DF | Sum of Squares | F      | Pr(>F) | Significance |
|---------------------|----|----------------|--------|--------|--------------|
| Sampling depth      | 1  | 0.00597        | 0.9217 | 0.427  |              |
| Site                | 1  | 0.0469         | 7.2256 | 0.001  | *** (0.001)  |
| Sampling depth:Site | 1  | 0.0045         | 0.6994 | 0.666  |              |

**Table S5: Assembly statistics for the co-assembled reads.**

| Site          | N50  | Sequences | Total Length |
|---------------|------|-----------|--------------|
| El Verde      | 1597 | 164848    | 240921112    |
| Sabana        | 1352 | 123957    | 162083707    |
| Palm Nido     | 1392 | 231188    | 307794698    |
| Pico del Este | 1547 | 174332    | 249155062    |

**Table S6: Summary statistics for the MAGs recovered from each sample**

| Location      | Completeness | Contamination |
|---------------|--------------|---------------|
| El Verde      | 99.14        | 2.04          |
| El Verde      | 97.41        | 3.45          |
| El Verde      | 77.9         | 1.72          |
| Sabana        | 93.7         | 3.6           |
| Palm Nido     | 84.7         | 4.0           |
| Pico del Este | 98.28        | 1.72          |

Only MAGs/bins >75% completeness and <5% contamination were used in downstream analyses.

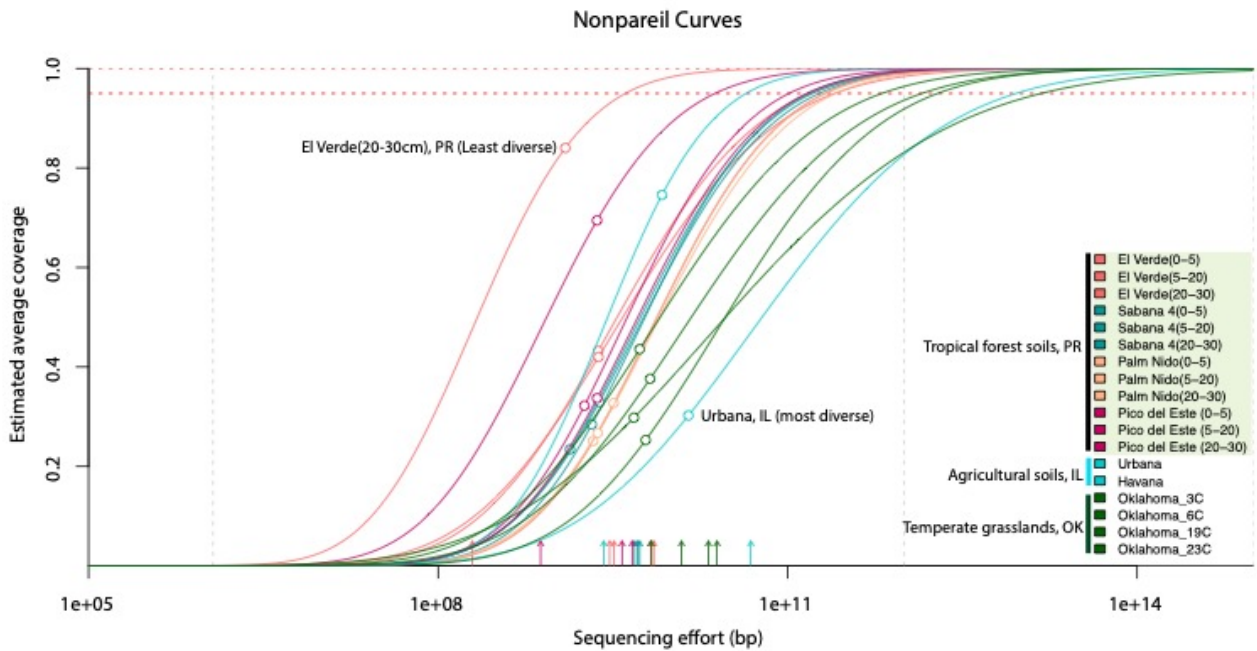

**Fig. S1: Nonpareil sequencing coverage estimates of the soil microbial communities.** Empty circles represent the estimated average coverage of the datasets obtained and projections based on model fitting to reach 95% and 99% coverage are indicated (horizontal dashed lines). Nonpareil curves representing the Puerto Rico tropical forest soil metagenomes (PR) as well those from Oklahoma temperate grasslands (OK) and Illinois agricultural soils (IL) are shown (see figure key). The arrows at the bottom represent sequencing effort required to achieve 50% coverage.

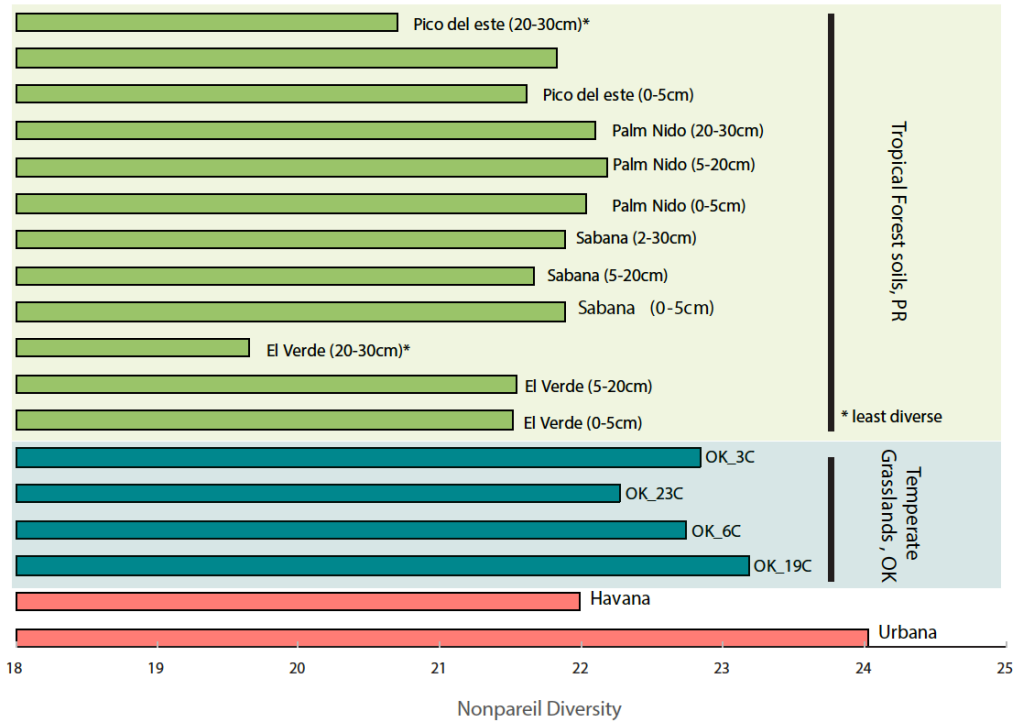

**Fig. S2: A. Nonpareil diversity ( $N_d$ ) values of PR, OK and IL metagenomic datasets.  $N_d$**

represents a metric of  $\alpha$ -diversity that takes into account both species evenness and richness as previously described (1).

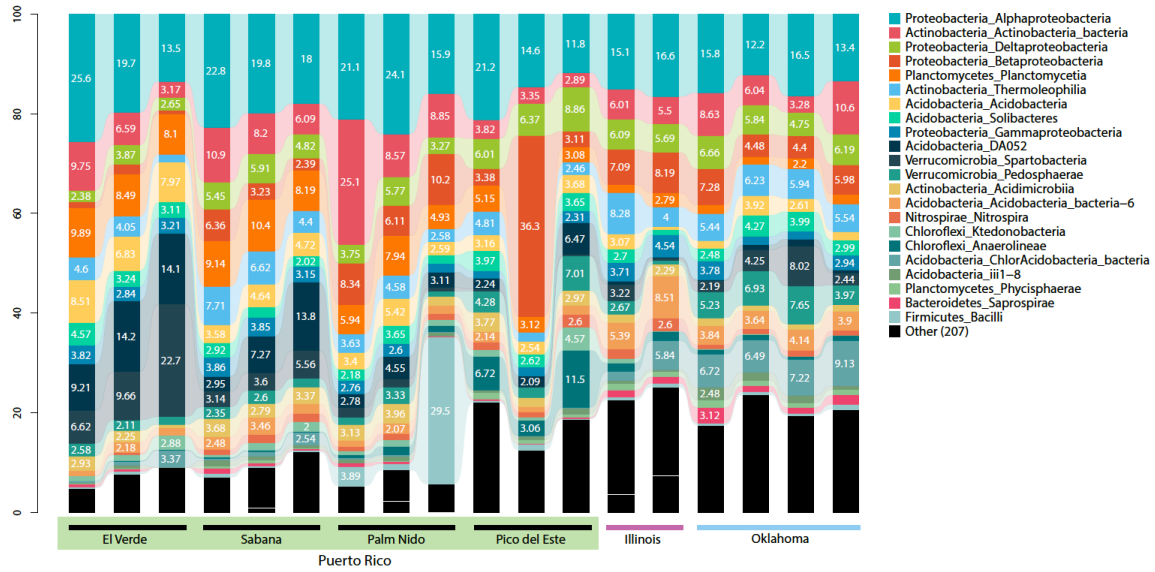

**Fig. S2: B. Microbial community composition variation across the forest sites based on 16S rRNA gene fragments recovered in the metagenomes.**

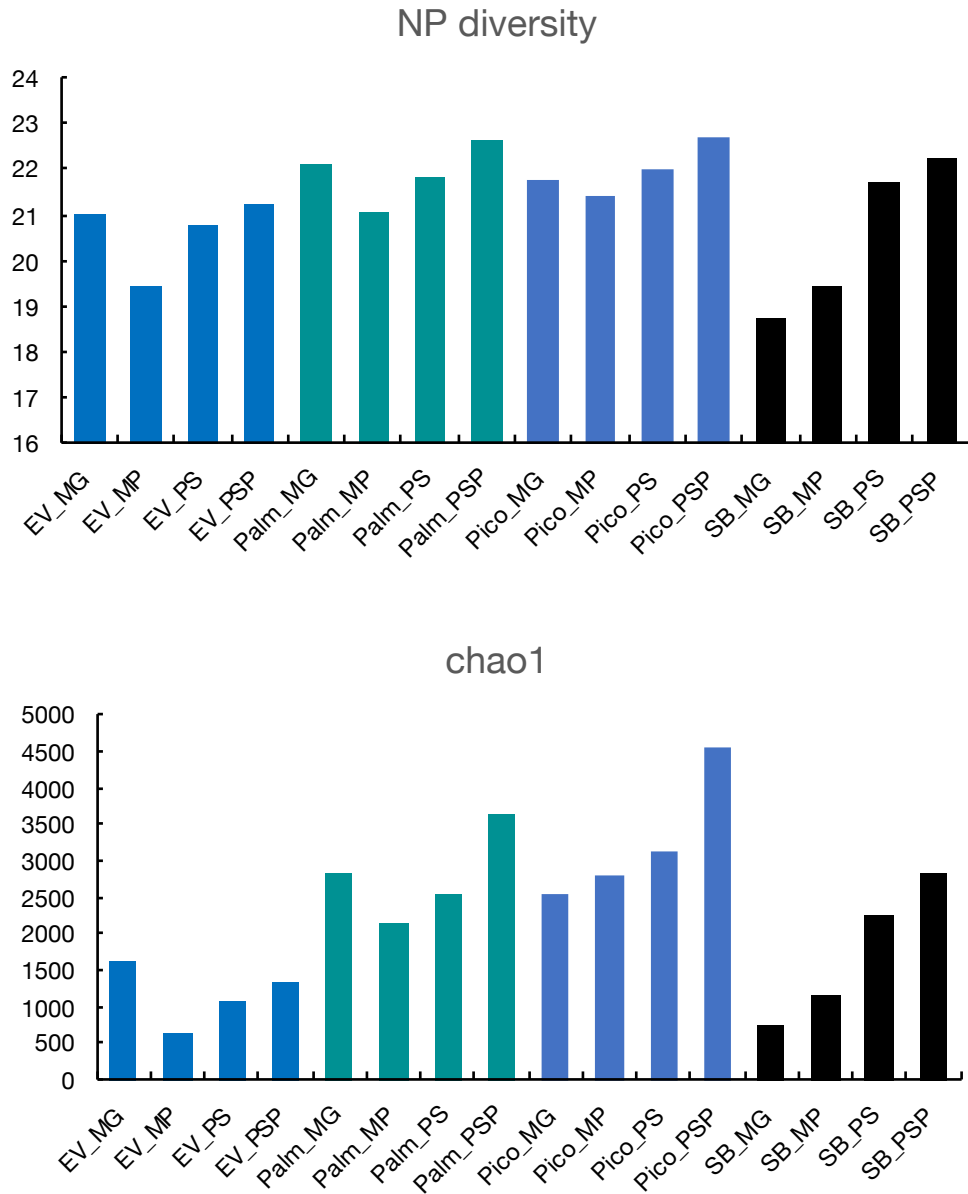

**Fig S3. Comparison of alpha diversity estimates among four different DNA extraction methods.** Upper Panel: Nonpareil diversity ( $N_d$ ) estimates for the samples across the 4 sites and 4 different DNA extraction methods ( $N_d$  is given in log scale). Lower panel: Chao1 diversity estimates based on 16S rRNA gene-based OTUs for the samples across the 4 sites and 4 different DNA extraction methods. EV: El Verde, Palm: Palm Nido, Pico: Pico del Este, SB: Sabana, MG: Modified Griffith's protocol, MP: modified MP Bio FastDNA Spin kit protocol, PS: Qiagen PowerSoil kit, PSP: Qiagen PowerSoil Pro kit. Note: The MP method used in the samples reported in the main text provided similar diversity to other methods, especially for mid- and high-altitude samples, and similar trends across all samples in general. The Tsai-Olson extraction method (2) did not yield high quality DNA even after two column clean-up steps and hence, was not used in downstream analyses.

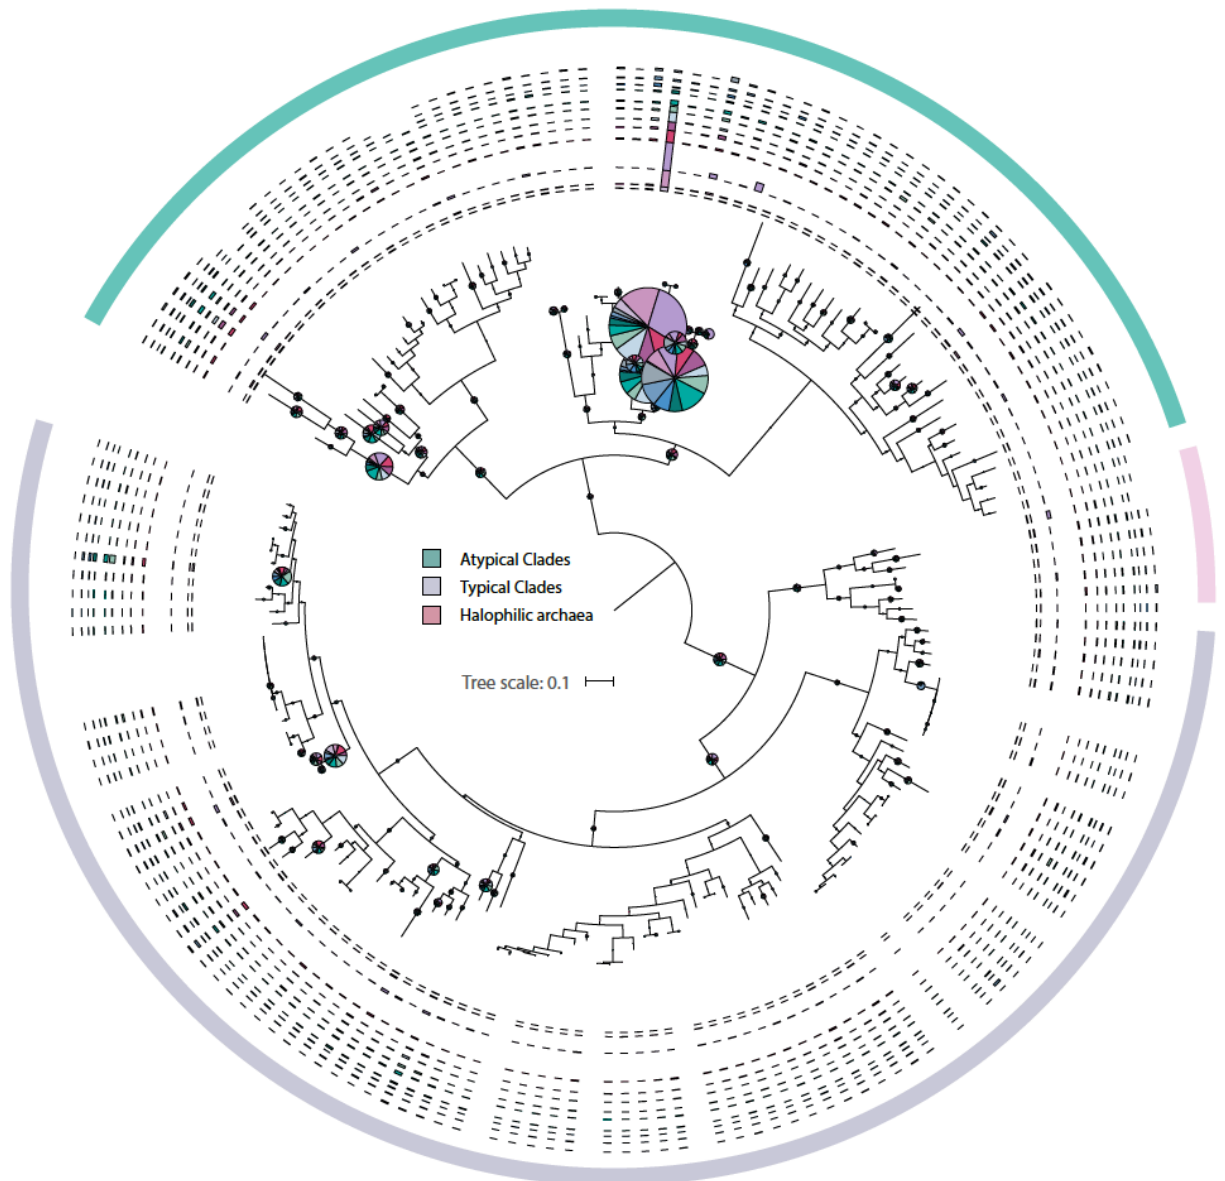

**Fig. S4: *nosZ* phylogeny for forest soils (PR).** Pie charts are proportional to the read placement and the bars represent the number of reads recruited by the corresponding subclades from each site (normalized by genome equivalents per single-copy gene; see Materials and Methods for further details). Scale bars are the same as shown in Fig. 3 of the main text.

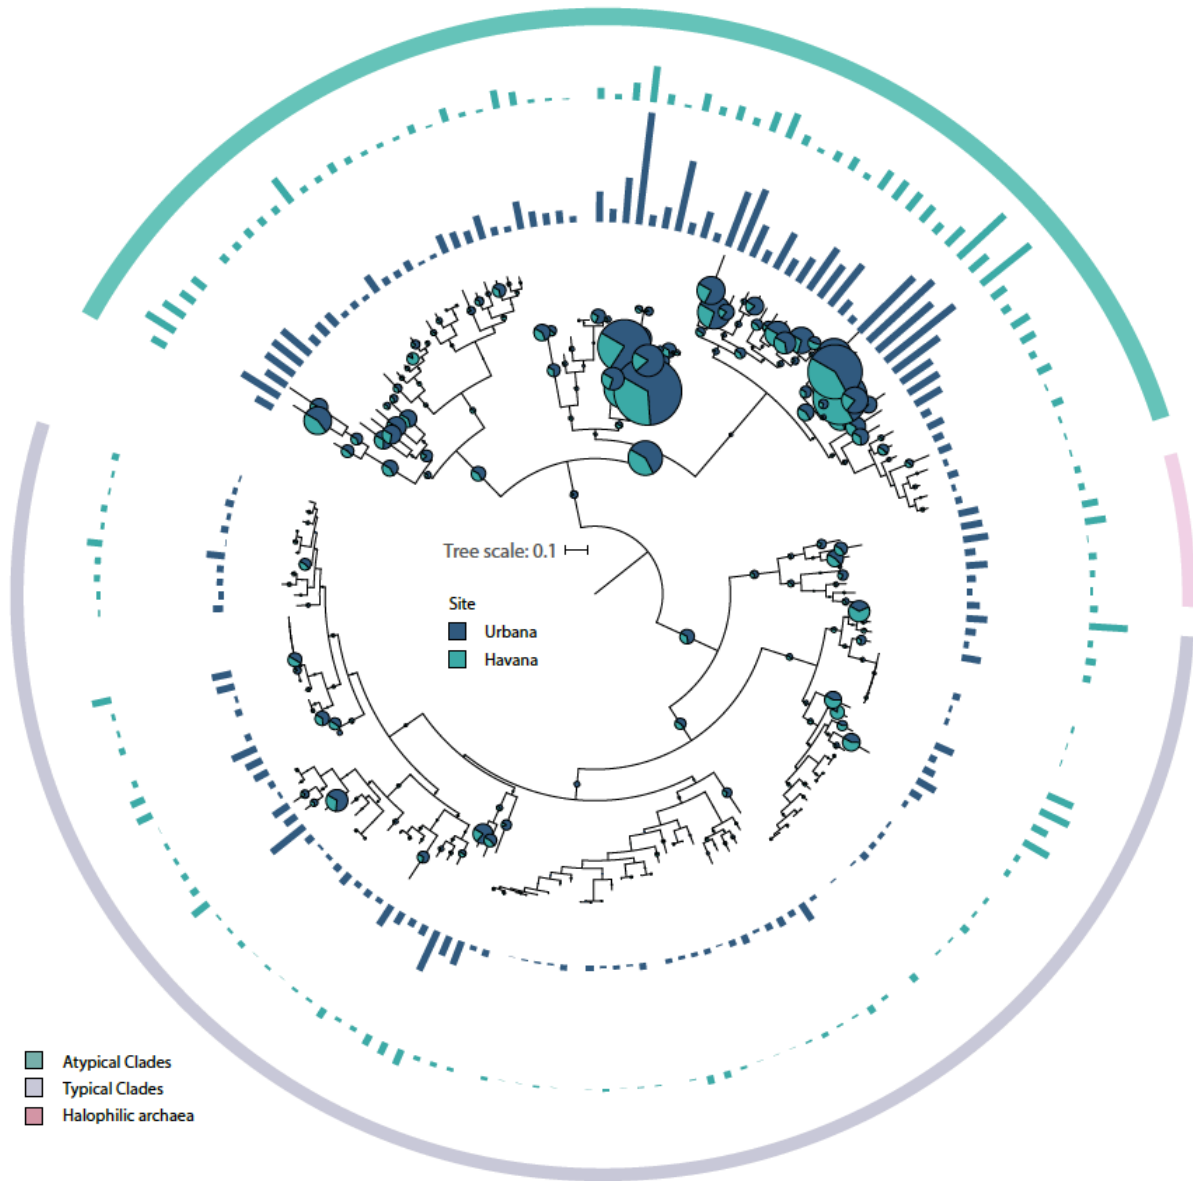

**Fig. S5: *nosZ* phylogeny for agricultural soils (IL).** Pie charts are proportional to the read placement and the bars represent the number of reads recruited by the corresponding subclades from each site (normalized by genome equivalents per single-copy gene; see Materials and Methods for further details). Scale bars are the same as shown in Fig. 3 of the main text.



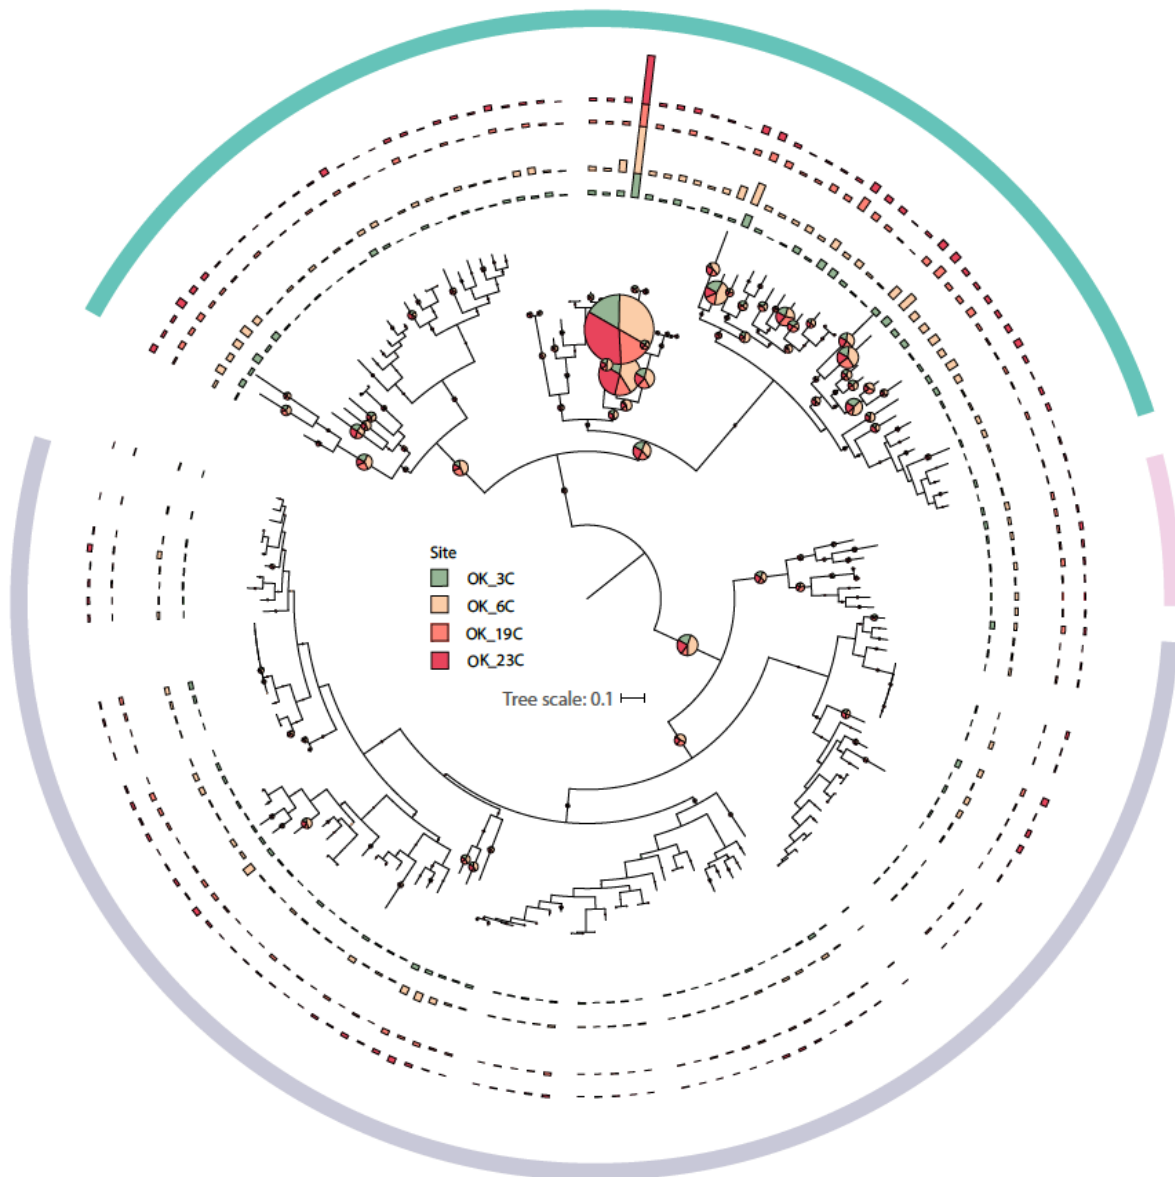

**Fig. S6: *nosZ* phylogeny for restored grassland soils (OK).** Pie charts are proportional to the read placement and the bars represent the number of reads recruited by the corresponding subclades from each site (normalized by genome equivalents per single-copy gene; see Materials and Methods for further details). Scale bars are the same as shown in Fig. 3 of the main text.

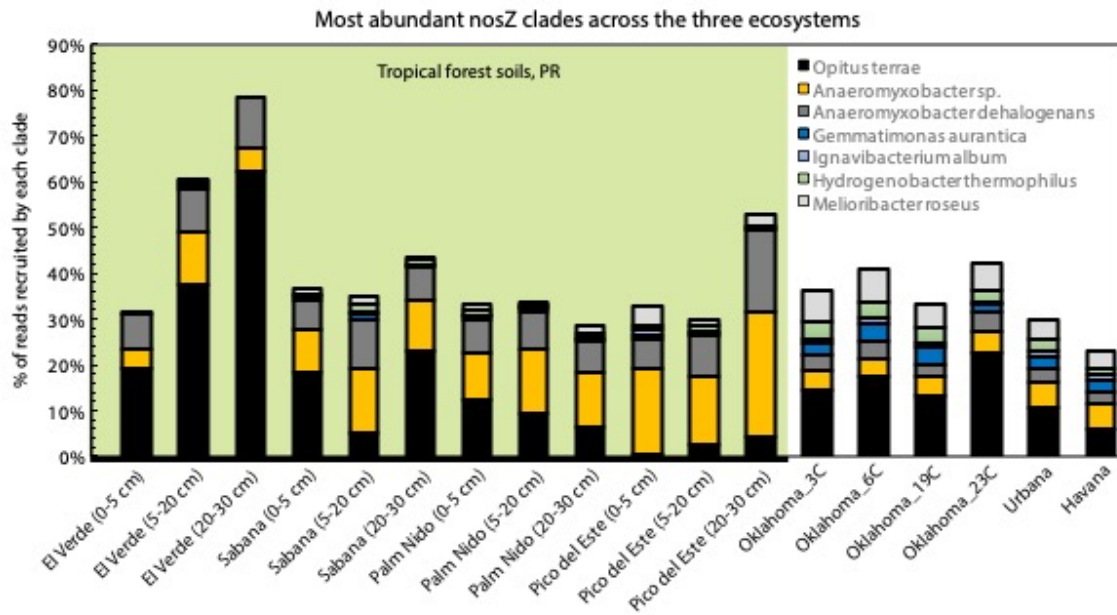

**Fig. S7: Most abundant *nosZ*-encoding sub-clades and their distribution across the three ecosystems described in this study.** The graph shows the relative abundances of *nosZ* OTUs defined at the 95% nucleotide sequence identity level.

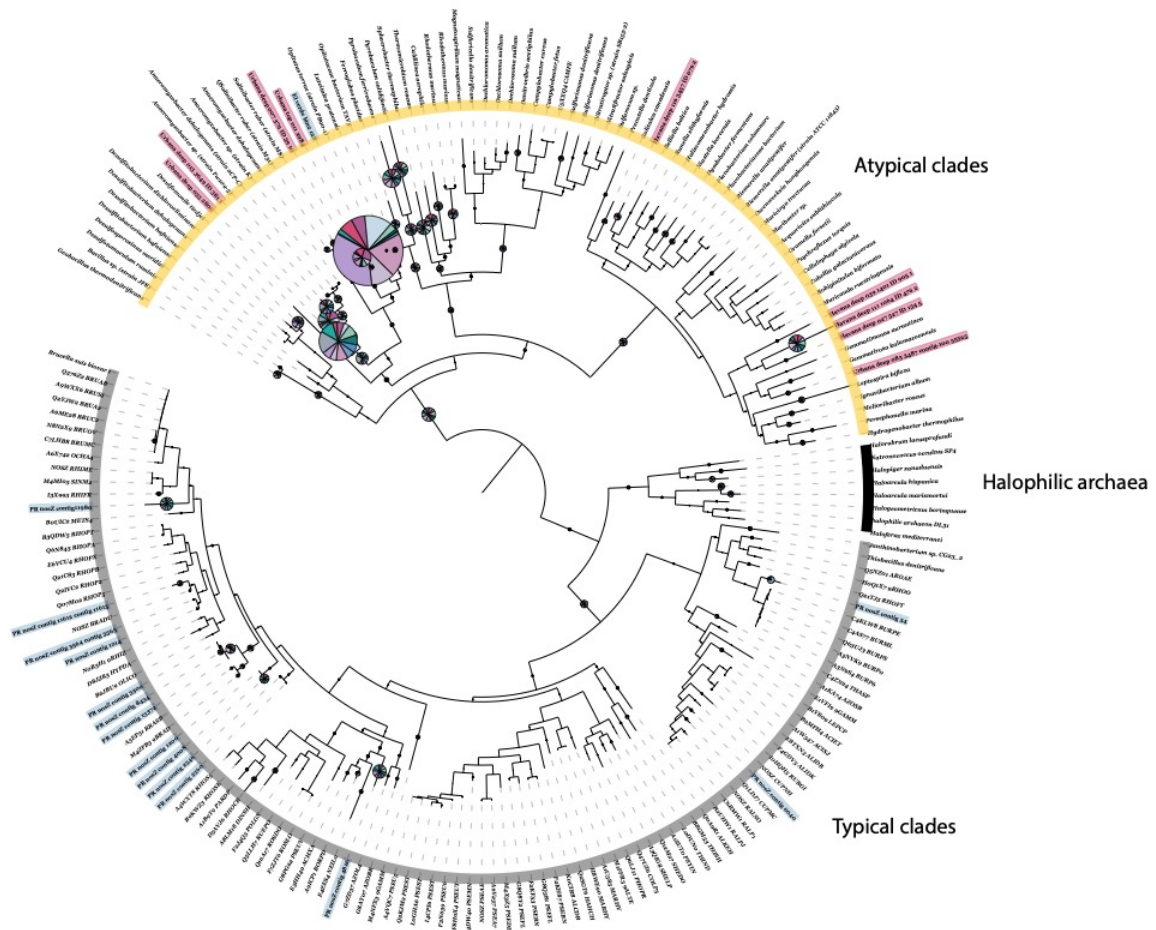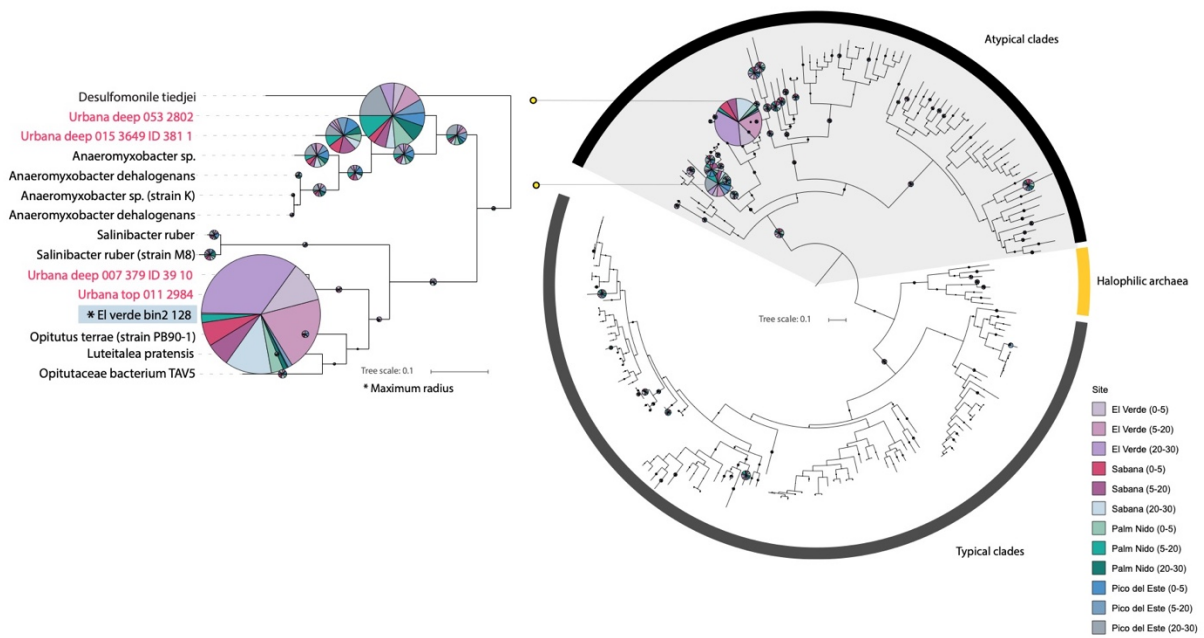

**Fig. S8: *nosZ* phylogeny for forest soils (PR) with the updated reference tree including putative near full length *nosZ* sequences identified from assembled contigs/MAGs.**

Subclades highlighted with color in the top panel are sequences recovered from assemblies (i.e., not from isolate genomes). The lower panel shows an in-depth (zoomed) view of the Clade II (atypical) that recruited most of the short reads. Subclades highlighted as Urbana/Havana indicate sequences recovered from the IL soil assemblies. The sequence highlighted in blue was recovered from a PR soil MAG (closely related to *Optitutus terrae*). Note that most of the short-reads are recruited by these subclades.

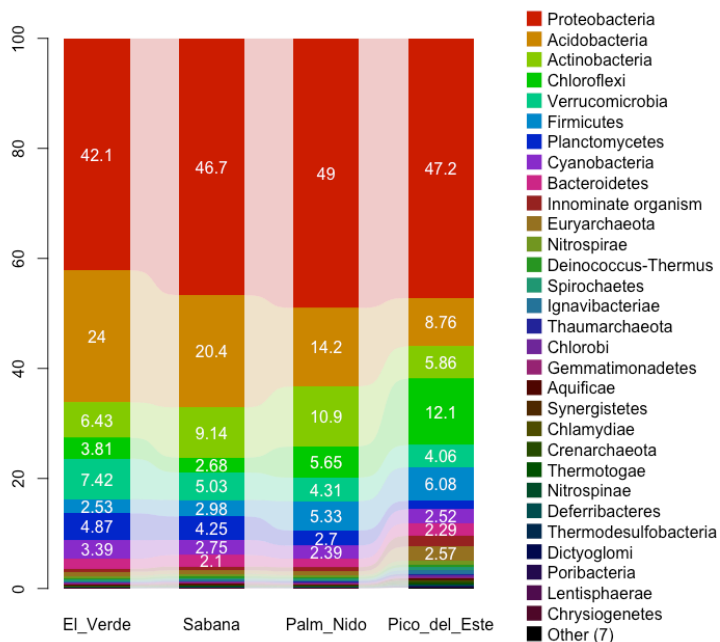

**Fig S9. MyTaxa classification of the co-assembled reads showing the dominance of bacteria in the four forest sampling sites.**

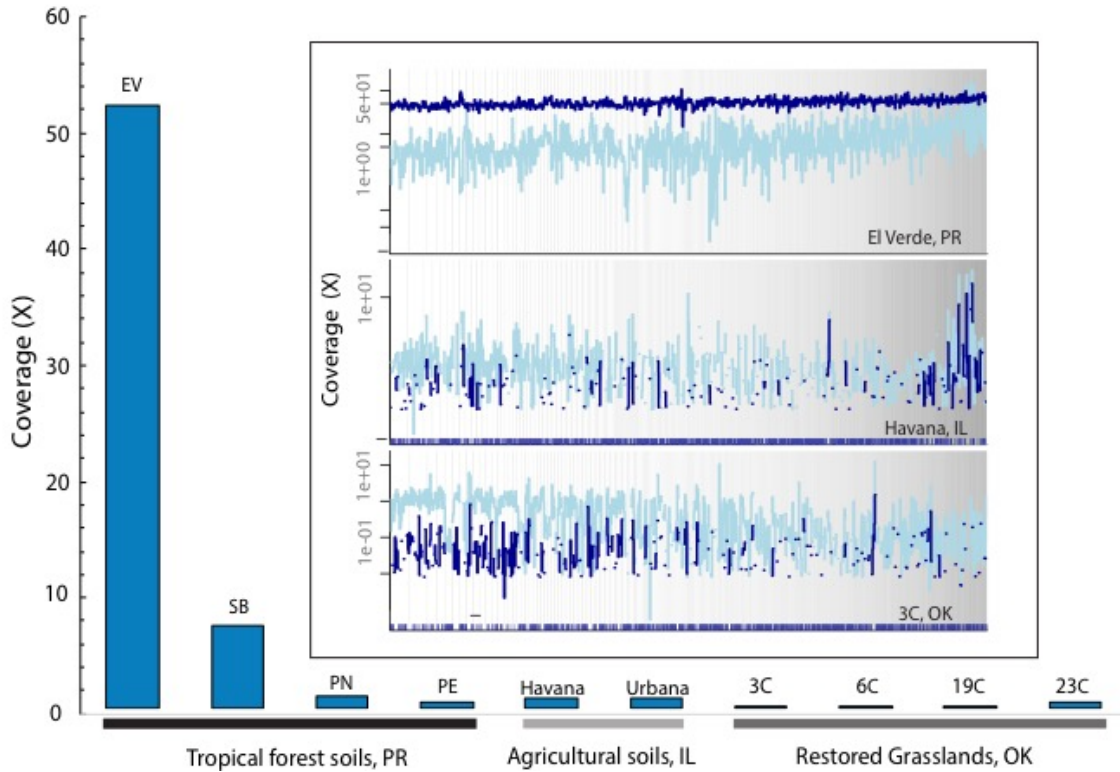

**Fig S10. Abundance dynamics of population MAG 1 (*Verrucomicrobia*) across the sampling sites.** Inset: Read recruitment plot showing the average coverage of the MAG across its genome, in 1,000bp windows, by the metagenomic reads from tropical (PR) and natural prairie (OK) sites (figure key). The dark blue histogram represents the coverage by reads matching the reference genome at  $\geq 80$ bp in length and  $\geq 95\%$  nucleotide identity; light blue represents reads matching at  $< 95\%$  identity. The evenness of the coverage of the genome on the metagenomic datasets shows a sequence discrete population as described previously (3-4). Main graph shows the average coverage (single value) from the recruitment plots (y-axis) for each metagenome sample (x-axis)

## References Cited

1. Rodriguez-R LM, Gunturu S, Tiedje JM, Cole JR, Konstantinidis KT. 2018. Nonpareil 3: fast estimation of metagenomic coverage and sequence diversity. *mSystems* 3:e00039-18. <https://doi.org/10.1128/mSystems.00039-18>.
2. Tsai YL, Olson BH. 1991. Rapid method for direct extraction of DNA from soil and sediments. *Applied and Environmental Microbiology* 57:1070-1074.
3. Caro-Quintero A, Konstantinidis KT. 2012. Bacterial species may exist, metagenomics reveal. *Environ Microbiol* 14:347-355.
4. Meziti, A., Rodriguez-R LM, Hatt JK, Peña-Gonzalez A, Levy K, Konstantinidis KT. How reliably do metagenome-assembled genomes (MAGs) represent natural populations? Insights from comparing MAGs against isolate genomes derived from the same fecal sample. *Applied and Environmental Microbiology* 87(6):e02593-20. doi: 10.1128/AEM.02593-20.
